# Supplementary material for: Structural Mechanism of ER Retrieval of MHC Class I by Cowpox
Source: PLoS Biol. 2012 Nov 27;10(11):e1001432. doi: 10.1371/journal.pbio.1001432 (PMC3507924; doi:10.1371/journal.pbio.1001432)
Supplement: Table S5 — Buried surface area comparison of CPXV203/MHCI to similar interfaces. (DOCX) [file pbio.1001432.s009.docx]

**Table S5. Buried surface area comparison of CPXV203/MHCI to similar interfaces.**

|  | **CPXV203/H-2Kb** | **US2/HLA-A2** | **CD8/H-2Kb** | **CD8/H-2Dd** | **Ly49A/H-2Dd** | **Ly49C/H-2Kb** | **LIR-1/HLA-A2** |
| --- | --- | --- | --- | --- | --- | --- | --- |
| Receptor/MHCI | 3342 (558) | 1272 (223) | 2936 (270) | 1501 (149) | 3343 (343) | 2368 (222) | 1712 (315) |
| Receptor | 1668 (263) | 628 (85) | 1477 (147) | 705 (62) | 1729 (149) | 1217 (92) | 864 (144) |
| MHCI | 1675 (295) | 645 (138) | 1460 (123) | 797 (87) | 1614 (194) | 1152 (130) | 848 (171) |
| 2m | 565 (125) | 0 (0) | 233 (10) | 7 (0) | 456 (59) | 281 (20) | 566 (129) |
| HC | 1110 (170) | 645 (138) | 1226 (114) | 790 (87) | 1159 (135) | 871 (110) | 282 (43) |
| Platform | 566 (77) | 270 (72) | 133 (0) | 25 (0) | 934 (130) | 555 (63) | 0 (0) |
| 1 | 5 (0) | 24 (19) | 57 (0) | 0 (0) | 298 (61) | 20 (0) | 0 (0) |
| 2 | 560 (77) | 246 (53) | 76 (0) | 25 (0) | 636 (69) | 535 (63) | 0 (0) |
| 3 | 544 (93) | 375 (66) | 1093 (114) | 765 (87) | 224 (5) | 316 (47) | 282 (42) |
| Tpn/CD8 3 ridge | 441 (86) | 0 (0) | 796 (101) | 543 (76) | 128 (5) | 152 (27) | 5 (0) |
| Affinity (pH 7.4) | 480 nM | Low nMa | ≥35000 nMa | 8200 nMa | ≥6000 nMa | ≥80000 nMa | >3000 nMa |
| (pH 6.0) | 10 nM | - | - | - | - | - | - |

Buried surface areas (BSA) were calculated with NACCESS (Hubbard and Thornton, 1993) using a 1.4 Å probe. BSA results are listed as TOTAL (MAIN-CHAIN) Å2. MHCI domains: 1 (1-90), 2 (91-180), 3 (181-274). Tpn/CD8 3 ridge (220-233) includes CD loop and part of strand D.

2m (M0) is present in all complexes. The measured affinity or an estimate (grey text) based on available literature is listed for each complex.

PDB coordinates used in this table: 1IM3, 1BQH, 3DMM, 1QO3, 3C8K, 1P7Q.

aPlease see SUPPLEMENTAL METHODS for references for these binding constants.
